# Supplementary material
Source: Research Square preprint supplement (doi:10.21203/rs.3.rs-9573704/v1)
Supplement: Supplementary file 1 [file 9c5bfcd28ed34a5d34693d2c.docx]

Guidance on integrating marine environmental impacts of marine technologies into life cycle assessment -

Application to ocean alkalinity enhancement

Supplementary Information

Mona H. Delval *a, Patrik J.G. Henriksson a,b, Paul Behrens a,c, Laura Scherer a, Pablo Trucco-Pignata d, Patricia Grasse e,f, Phil Renforth g, and Nils Thonemann a

1. Institute of Environmental Sciences (CML), Leiden University, Einsteinweg 2, 2333 CC, Leiden, the Netherlands.
2. Stockholm Resilience Centre, Stockholm University, Albanovägen 28, 106 91, Stockholm, Sweden.
3. University of Oxford, Oxford Martin School, 34 Broad St, OX1 3BD, Oxford, United Kingdom.
4. National Oceanography Centre, Southampton, United Kingdom.
5. German Centre for Integrative Biodiversity Research (iDiv) Halle-Jena-Leipzig, 04103, Leipzig, Germany
6. GEOMAR Helmholtz Centre for Ocean Research Kiel, 24148, Kiel, Germany
7. Research Centre for Carbon Solutions, Heriot-Watt University, Edinburgh, United Kingdom

** Corresponding author. m.h.delval@cml.leidenuniv.nl (M.H. Delval)*

# A. Technical information on ocean alkalinity enhancement

In ocean alkalinity enhancement (OAE) approaches, alkaline materials are intentionally added to marine environments via mineral, industrial, or electrochemical sources. As these materials dissolve, alkaline materials consume protons (H+) in seawater and pore waters. Subsequently, a shift of marine carbonate chemistry equilibrium occurs, with dissolved carbon dioxide (CO2) in water converted into bicarbonate (HCO3−) and carbonate (CO32−) ions. This shift is measurable by an increase in total alkalinity (TA). Consequently, the partial pressure of CO2 (pCO2), which is proportional to the concentration of dissolved CO2 in seawater, is reduced, which enhances the air-sea flux of CO2 into the ocean until re-equilibration is reached (Renforth and Henderson 2017; Bach et al. 2019; NASEM 2022). Hence, OAE increases the ocean’s capacity to store dissolved inorganic carbon and moderates pH changes. Carbon storage via OAE is expected to persist for centuries to millennia due to the long residence time of dissolved inorganic carbon in the ocean (Hartmann et al. 2023).

While OAE technologies have mostly remained at the laboratory phase (around technical readiness level (TRL) 3 to 5) or the pilot phase (TRL 6 to 8), many are discussing the large-scale deployment of OAE in the coming years or decades. Several field trials have been conducted, are currently running, or are scheduled by start-ups, universities, and research groups. These field trials are taking place mostly in the US and Europe (Ocean Visions 2025). The first OAE carbon credits were recently issued (Isometric 2025).

# Exposure and effect processes for humans and structures with instrumental or cultural value to humans as sensitive receptors

*Human exposure*

Humans can be exposed to alkaline materials via physical exposure and exposure by ingestion. Physical exposure occurs through skin, eye contact, or inhalation (NASEM 2022; Gentile et al. 2022). However, once alkaline material is added to the ocean, risk of this exposure process is low, especially in OAE approaches deployed in the open ocean or near or onto marine sediments. For coastal enhanced weathering (CEW), the choice of deployment site should avoid locations with high human activity. Exposure risks are higher by ingestion; trace metals co-released and ingested by marine species can bioaccumulate along the marine food chain, eventually ending up in food consumed by humans (Bach et al. 2019; NASEM 2022). However, this potential exposure process is an area of few studies.

*Effects on human health*

Alkaline material can have toxic effects on humans. Direct physical exposure to alkaline materials can cause pneumonia, bronchitis, or dermatitis. The severity will be proportional to the duration and degree of exposure (Bach et al. 2019; NASEM 2022; Gentile et al. 2022). Indirect exposure by ingestion could affect human health, notably if toxic substances like trace metals bioaccumulate in the food chain (Bach et al. 2019). Of particular concern are trace metals present in steel slags and the high concentration of nickel in olivine (NASEM 2022; Oschlies et al. 2025). However, this issue has not yet been well studied.

*Exposure of structures with instrumental or cultural value to humans*

For marine impact pathways, structures with instrumental or cultural value to humans include coastal touristic sites or fisheries zones (Woods et al., 2021). If located near OAE deployment sites, these structures could be indirectly exposed to altered ocean chemistry, including localised reductions in dissolved CO2 levels (Nawaz et al. 2023). However, given the other outstanding gaps in knowledge on exposure processes for marine species and ecosystems as well as humans, the second-order impacts on touristic sites or fisheries are even more uncertain.

*Effects on socio-economic assets and ecosystem services*

The effects of alkaline mineral exposure on fisheries could be both positive and negative. Fisheries located near OAE deployment sites, where local ocean chemistry is altered, could be affected by a reduction in photosynthesis. This may disrupt phytoplankton communities, indirectly affecting marine food webs and, ultimately, those fisheries (Nawaz et al. 2023). In contrast, the mitigation of ocean acidification by OAE through changed ocean chemistry could enhance fish stocks and benefit fisheries (Sloterdijk et al. 2025). However, these effects and their significance are not well understood and could vary depending on the type of alkaline material used (Le Quesne and Pinnegar 2012; Haigh et al. 2015; Nawaz et al. 2023).

Tourism may also experience both beneficial and adverse effects. For instance, the counteraction of ocean acidification could positively affect the aesthetic value of marine environments, potentially benefitting tourism. Conversely, potential human health concerns related to trace metal bioaccumulation could affect public perception and deter tourism activity (Nawaz et al. 2023).


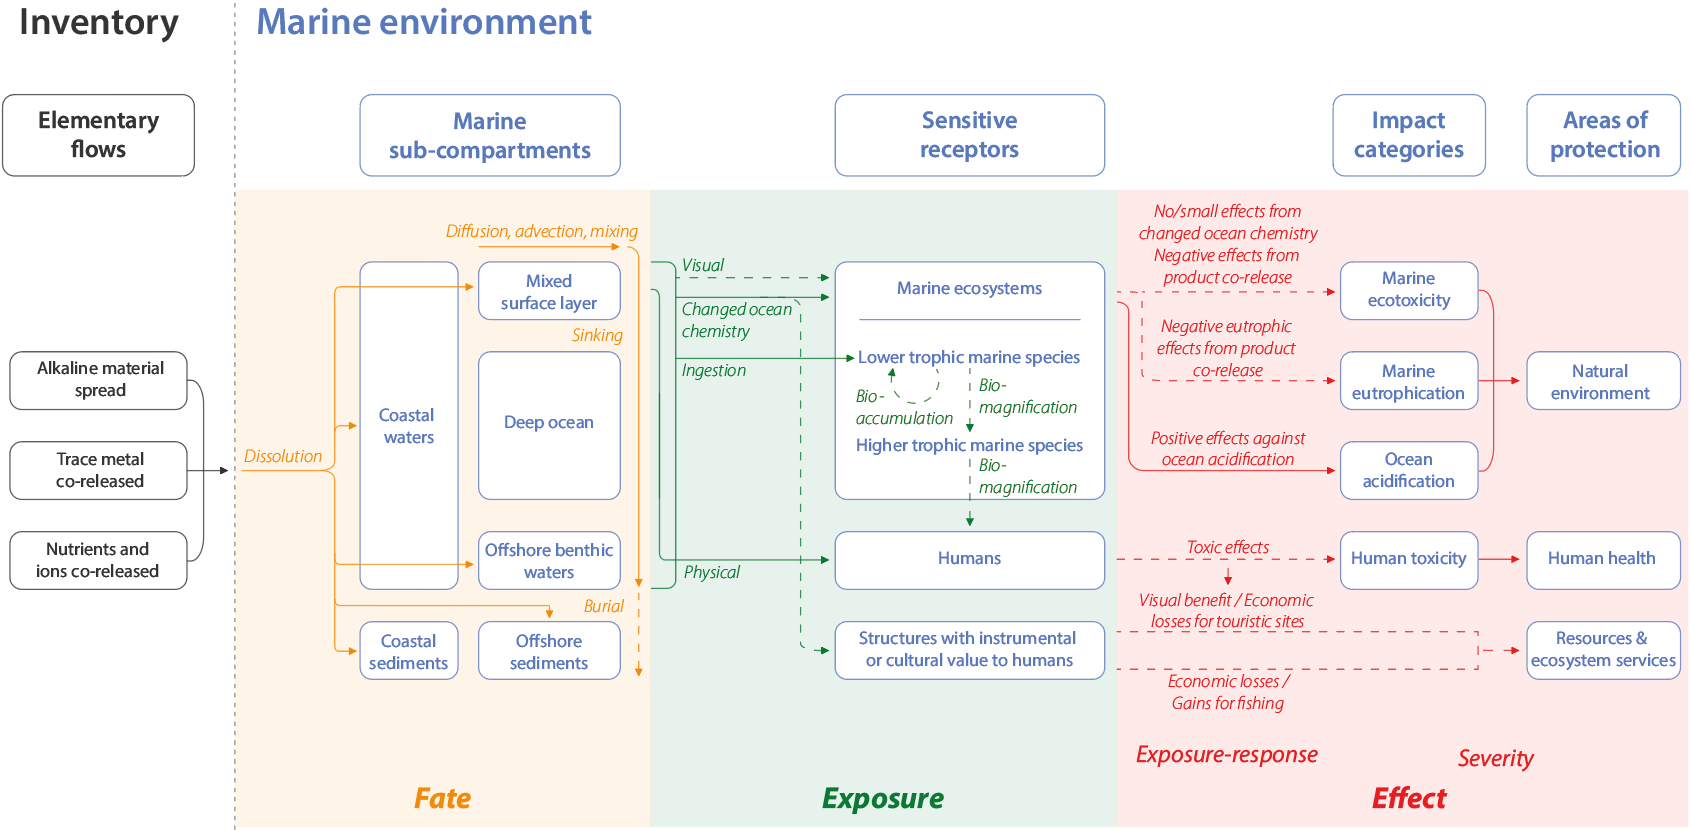


Marine impact pathways of ocean alkalinity enhancement, including humans and structures with instrumental or cultural value to humans. Solid arrows indicate established linkages, while dashed arrows represent uncertain or currently under-researched connections based on the present state of knowledge.

# Fate processes of OAE: Their effects on alkaline material’s residence time, and main factors influencing these processes

We identified five key fate processes for alkaline material and its co-released elements introduced into the marine environment through OAE: diffusion, mixing, sinking, burial, and dissolution.

*Diffusion, mixing, and sinking*

These processes weaken with increasing distance as the alkaline material concentration lowers, and dissolution occurs (Bach et al. 2019). Alkaline material transport in the ocean further depends on water column stratification and, in the case of solid particulate addition, the material grain size, with larger grains remaining undissolved longer and being transported further or sinking quicker (Bach et al. 2019; He and Tyka 2023; Zhuang et al. 2025). Seasonality also influences sinking, with the decrease in ocean water layers mixing in the summer reducing mineral sinking (Nagwekar et al. 2024).

*Burial*

The extent to which it may remain undisturbed in sediments is not clearly established. Over timescale up to millennia, diagenesis, a combination of physical, chemical and biological processes, may alter the buried material, forming new minerals and modifying sediments (Scholz et al. 2013). Burial likely depends on human-induced sediment disturbance and marine sediment organisms’ activities facilitating deeper mineral penetration into sediments (Dale et al. 2024; Fuhr et al. 2025).

*Dissolution*

The faster the dissolution, the less accumulation and transport to other oceanic zones. To achieve optimal CDR efficiency, material added at the ocean surface must dissolve in the upper layer and thus not sink too rapidly (Eisaman et al. 2023). As it dissolves, the material potentially releases other elements such as trace metals and essential nutrients and ions (Bach et al. 2019).

A range of factors influence dissolution, such as the alkaline material type, grain size, and amount added. For instance, pulverised carbonate minerals tend to dissolve faster than pulverised silicate minerals (Eisaman et al. 2023). Smaller grains have a higher reactive surface area allowing for faster dissolution (Foteinis et al. 2023). However, below a certain size, a fast dissolution can lead to oversaturation with respect to carbonate and hydroxide minerals, preventing further dissolution and resulting in secondary precipitation (Fuhr et al. 2025). If large quantities of the mineral are added, the solution reaches oversaturation more quickly, which reduces the overall dissolution efficiency (Hartmann et al. 2023). The saturation state is therefore another key factor, with dissolution favoured when seawater is undersaturated with respect to that particular mineral (Dale et al. 2024). After addition, waves, currents, and tides support the dissolution (Montserrat et al. 2017). Higher dissolution also occurs at high levels of partial pressure of CO2 (pCO2) (Pickett and Andersson 2015), low levels of pH (Oelkers et al. 2018), and under high temperatures (Rimstidt et al. 2012).

Lastly, we identified additional factors affecting dissolution for enhanced benthic weathering (EBW) approaches specifically. The so-called benthic weathering engine (BWE), a range of processes conducted by micro-organisms and invertebrate marine species that favour calcite dissolution in sediments, especially in Baltic anoxic sediments (Meysman and Montserrat 2017; Fuhr et al. 2025; Anschütz et al. 2025). For instance, sediment-feeding organisms ingest and break down deposited alkaline material before releasing again, which favours dissolution. Bioturbation (i.e., the movement of sediments by organisms) enhances the penetration of alkaline material into sediments, where water is typically less supersaturated than overlying bottom waters. This can promote more effective dissolution of the alkaline material. Given that bioturbation depends on oxygen and bottom-water oxygen concentration fluctuates seasonally, both oxygen availability and seasonalityare critical factors for dissolution in EBW approaches (Dale et al. 2024). The role of oxygen levels in other OAE approaches has had less attention. Other potential factors include salinity, whichmay favour dissolution for some minerals (e.g., carbonates and olivine) but not all (Moras et al. 2024; Dale et al. 2024; Geerts et al. 2025) Additionally, electrogenic sulphide oxidation by cable bacteria can lower calcite saturation in sediments, enhancing the dissolution of acid-sensitive minerals in CEW and EBW approaches (Dale et al. 2024; Fuhr et al. 2025). However, more research is needed to understand these mechanisms (Meysman and Montserrat 2017; Dale et al. 2024).

# D. Marine impact pathways of ocean alkalinity enhancement, per impact categories


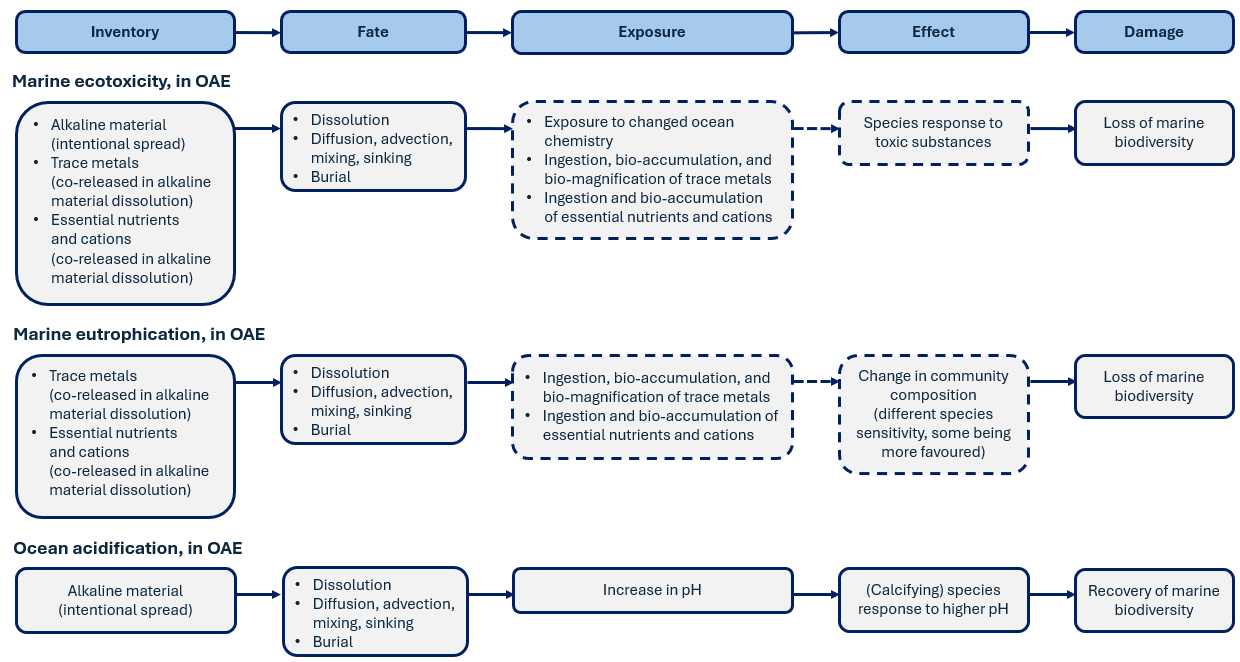


Marine impact pathways for marine ecotoxicity, marine eutrophication, and ocean acidification. Solid arrows and outlines indicate established linkages and processes, while dotted arrows and outlines represent uncertain or currently under-researched connections and processes based on the present state of knowledge.

# E. Detailed overview of marine impact categories in life cycle impact assessment models

## I. Marine ecotoxicity

Marine ecotoxicity can be found in two life cycle impact assessment (LCIA) method families in ecoinvent: CML (v4.8, 2016) at the midpoint level and ReCiPe (v1.03, 2016) at the midpoint and endpoint levels. In the CML method family, this impact category is based on the midpoint model USES-LCA (Huijbregts et al. 2000), which was the first characterisation model to distinguish marine ecotoxicity from general aquatic ecotoxicity and to include marine sediment ecotoxicity as a separate impact category (Carvalho et al. 2024). However, the marine sediment impact category was excluded from the CML baseline due to criticisms concerning the robustness of its modelling (Heijungs and de Koning 2004). An updated version, USES-LCA 2.0 (Van Zelm et al. 2009), is used in the ReCiPe method family (Huijbregts 2016). This new version expands substance coverage (from 181 in USES-LCA to 3,396 in USES-LCA v2.0) and enables endpoint-level assessments.

However, both versions are considered suboptimal for assessing the ecotoxicity of metals, as they model metals similarly to organic compounds, which inaccurately capture their environmental behaviour (Huijbregts et al. 2000; Carvalho et al. 2024). Moreover, the geographical applicability of these models is limited, as their characterisation factors (CFs) are calculated based on emissions released in Western Europe. Regarding spatial resolution, both LCIA method families divide the ocean into an arctic, moderate, and tropical climate zones.

Other LCIA method families in ecoinvent lack a dedicated treatment of marine ecotoxicity and have:

- an aquatic ecotoxicity impact category that does not differentiate between freshwater and marine ecotoxicity (EDIP (2003)).
- an aquatic ecotoxicity impact category that is specifically about freshwater ecotoxicity (IMPACT 2002+ (endpoint)).
- only a freshwater ecotoxicity impact category (EF (v3.1); TRACI (v2.1); USEtox (v2.13)).
- only a freshwater ecotoxicity impact category that is aggregated with other impact categories (IMPACT World+ (v2.0.1, footprint version)).

Additional models for assessing marine ecotoxicity exist, but they are currently not integrated in LCIA method families in ecoinvent. Carvalho et al. (2024) conducted a systematic literature review of characterisation models for this impact category and identified five alternatives to the USES-LCA models. Among the more recent developments is the midpoint model byDong et al. (2016, 2018), which is unique in its accounting of metal speciation and spatial differentiation across 64 Large Marine Ecosystems (LMEs). However, these LMEs are limited to coastal waters, and the model only includes ecotoxicity CFs for nine metals (Cd, Co, Cr, Cu, Fe, Mn, Ni, Pb, and Zn). Another notable model is that of Verones et al. (2020), implemented in the LC-IMPACT method family, which adopts an endpoint approach. This model offers the most extensive substance coverage to date (2,526 in total) and divides the marine environment into nine ocean regions and 33 coastal regions (Kounina et al. 2014; Carvalho et al. 2024). Its global CFs (but not the regionalised ones) are exclusively available on the SimaPro software.

Since the publication of Carvalho et al. (2024), a new version of the IMPACT World+ method family (v2.1, expert version, 2024) has been released. This version includes an impact category for marine ecotoxicity at the endpoint level (which has as midpoint impact category freshwater ecotoxicity), based on Usetox (v2.02) (Bulle et al. 2019). This “expert” version is not available in ecoinvent, as it is a global regionalised LCIA model, and ecoinvent does not yet provide regionalised inventories.

In all these characterisation models, marine ecotoxicity is modelled for substances entering the marine compartment through freshwater systems (Huijbregts et al. 2000; Van Zelm et al. 2009; Kounina et al. 2014; Dong et al. 2018), as the main cause for marine ecotoxicity is the release of toxic substances via terrestrial industrial activities to surrounding freshwater environments, which then reach marine systems (Dong et al. 2016).

Despite its increasing integration into life cycle assessment (LCA) practice, the modelling of marine ecotoxicity remains debated among LCA experts (Carvalho et al. 2024). The site-dependent nature of these impacts complicates the development of characterisation equations for marine ecotoxicity (Hauschild et al. 2013). Moreover, the limited availability of marine toxicity data, particularly across multiple trophic levels and a broad range of substances, often necessitates extrapolations from freshwater species data (Fantke et al. 2018). As a result, marine ecotoxicity characterisation models differ importantly in their scope, assumptions, and methodological approaches (Carvalho et al. 2024).

## II. Marine eutrophication

In the LCA field, marine eutrophication is generally defined as the marine ecosystem response to excess (EC-JRC 2010; Henryson et al. 2018; Vea et al. 2024) or limiting nutrient inputs (Verones et al. 2020). These nutrients, primarily nitrogen (N) and phosphorus (P) (Henryson et al. 2018), are typically introduced into coastal waters (EC-JRC 2010; Vea et al. 2024), through agricultural runoff and atmospheric deposition originating from fossil fuel combustion (Verones et al. 2020). Their accumulation can lead to an oxygen depletion in benthic environments (EC-JRC 2010; Vea et al. 2024), ultimately disrupting ecosystem equilibrium (EC-JRC 2010; Henryson et al. 2018; Vea et al. 2024).

Although this pathway dominates human-induced marine eutrophication, other substances beyond N and P may also contribute, such as dissolved silicate (DSi) or iron (Fe), and co-limitation can take place (Cosme et al. 2018). Moreover, marine activities introduce additional anthropogenic pressures that may influence eutrophication processes. To capture this broader scope, we adopt the definition by Cosme and Hauschild (2017), who describe marine eutrophication as the marine ecosystem response to increased inputs of nutrients or organic matter from any anthropogenic source. This definition encompasses all cascading ecological effects of such an enrichment, with benthic oxygen depletion being a major outcome. Similar broad conceptualisations are also used by Struijs et al. (2009) and Huijbregts et al. (2017).

Two LCIA method families available in ecoinvent treat marine eutrophication as a distinct impact category: EF (v3.1) at the midpoint level and ReCiPe (v1.03) at the midpoint and endpoint levels. In the EF method family, CFs for marine eutrophication are derived from the ReCiPe (2008) midpoint model (EC-JRC 2012), which integrates the EUTREND model for airborne emissions and the CARMEN model for waterborne emissions to estimate fate factors (Struijs et al. 2009). Nutrient fate is modelled as released from agricultural activities and reaching coastal marine environments via soil surface and inland waters or via soil surface and atmospheric emissions. In the ReCiPe method family, CFs are derived from the endpoint model developed by Cosme and Hauschild (2017), which was the first model to characterise marine eutrophication at the endpoint level. The model simulates nutrient transport from agricultural activities to marine coastal waters solely via waterborne emissions, excluding airborne emissions. Distribution of sensitivity thresholds to hypoxia from marine species (fish, crustaceans, molluscs, echinoderms, annelids, and cnidarians) is used to derive the effect factors.

In both models, only N compounds are included as environmental flows, reflecting the assumption that marine waters are generally N-limited (EC-JRC 2012). Accordingly, model developers have assumed all coastal waters to be N-limited (Struijs et al. 2009; Cosme et al. 2015; Huijbregts et al. 2017). However, it is recognised that other nutrients, such as P or DSi, may also exert limiting effects, and that co-limitation mechanisms can occur in marine environments (Verones et al. 2020).

In terms of geographical scope, the EF model relies on a European-centred fate modelling approach (Struijs et al. 2009), whereas the ReCiPe characterisation model adopts a global framework, providing both global and continent-specific CFs (Huijbregts et al. 2017; Cosme and Hauschild 2017; Cosme et al. 2018). Regarding spatial resolution within the marine environment, the EF fate model distinguishes 41 coastal seas (Struijs et al. 2009), while the ReCiPe model subdivides the (coastal) marine environment into 66 LMEs (Cosme and Hauschild 2017).

Other LCIA method families in ecoinvent address marine eutrophication in different ways and have:

- a marine eutrophication impact category that is aggregated with other impact categories (IMPACT World+ (v2.1, footprint version)).
- aquatic eutrophication as an impact category at midpoint level, focusing specifically on freshwater eutrophication (IMPACT 2002+).
- eutrophication as a generic impact category (CML (v4.8); TRACI (v2.1); EDIP (2003)).

Three additional method families not integrated into ecoinvent also address marine eutrophication: IMPACT World+ (v2.1, expert version) at the midpoint and endpoint levels, LC-IMPACT at the endpoint level, and TRACI (v2.2) at the midpoint level. In IMPACT World+, marine eutrophication is treated as a globally regionalised impact category (Bulle et al. 2019), relying on the fate model developed by Roy et al. (2012) in which nutrients released from anthropogenic activities reaches marine waters as air emissions. In LC-IMPACT, marine eutrophication is based, similarly to the ReCiPe method family, on the endpoint model by Cosme and Hauschild (2017) and subdivides the marine compartment into LMEs (Verones et al. 2020). In TRACI, marine eutrophication is derived from the midpoint characterisation model of Henderson et al. (2021), and provides regionalised CFs for the United States (at state and county levels) as well as for world countries (at the country level) (Serafini and Ciroth 2024). The fate model accounts for nutrients released from human activities that reach marine waters (LMEs) either directly, through emission to the marine environment, or indirectly, through emissions to air that subsequently reaches marine waters or first deposit on soil of freshwater before ultimately entering marine waters. These three models only include N compounds as environmental flows.

Additionally, a characterisation model for marine eutrophication has been developed for Sweden, representing the only midpoint-level model that accounts for both N and P inputs; however, it has not yet been integrated into any LCIA method family (Henryson et al. 2018). In this model, nutrients are modelled to reach marine environments directly from agricultural leaching or indirectly through terrestrial and freshwater pathways. For more information of eutrophication-related modelling approaches, Morelli et al. (2018) conducted a critical review of 15 nutrient fate and transport models relevant to eutrophication, along with five LCIA eutrophication models. However, this review is not specific to marine eutrophication, as it also encompasses freshwater eutrophication.

To address marine eutrophication more directly, Henryson et al. (2020) has compared five characterisation models (Struijs et al. (2009), Cosme and Hauschild (2017), Henryson et al. (2018), the model implemented in the 2008 version of ReCiPe (Huijbregts et al. 2017), and the midpoint model implemented in the CML method family (Guinée 2002)). Their case study shows that marine eutrophication results can vary up to an order of magnitude, depending on the model chosen. This variability stems from a trade-off between wide geographical coverage and accurate representation of local environment conditions within the models.

More recently, Vea et al. (2024) integrated the latest advances in both LCIA and absolute environmental sustainability assessment frameworks into a unified method. This new approach improves the spatial resolution of the marine (coastal) compartment by incorporating previously omitted marine regions and enhances the fate model by including denitrification and plant uptake mechanisms in the pathway from atmospheric emission to terrestrial deposition. However, the method is designed for assessing marine eutrophication arising from emissions to soils, freshwater, and air, and is therefore unsuitable for evaluating direct ocean emissions. Furthermore, it is still limited to N compounds.

## III. Ocean acidification

The ocean acidification impact category is not yet included in LCIA method families found in ecoinvent. To address acidification, these method families either have:

- aquatic acidification as an impact category, but it is limited to freshwater acidification (IMPACT 2002+ (midpoint)).
- only terrestrial acidification as an impact category (IMPACT 2002+ (endpoint); LC-IMPACT; ReCiPe (v1.03)).
- a generic acidification impact category that does not differentiate between compartments (CML (v4.8); EDIP (2003); EF (v3.1); TRACI (v2.1)).
- no dedicated acidification impact category (IMPACT World+ (v2.0.1, footprint version)).

Additionally, in all these models, acidifying emissions are modelled as being released to the atmosphere. In contrast, the impact pathway addressed in our study involves the release of alkaline mineral directly into the ocean, which contributes to counteracting ocean acidification.

While ocean acidification is not represented as an impact category in these method families, several scientific efforts over the past decade have been made to model it in LCIA. IMPACT World+ introduced a marine acidification (i.e., ocean acidification) endpoint impact category, though this is only available in the expert version which is not available in ecoinvent due to its reliance on regionalised inventories (Bulle et al. 2019). This ocean acidification impact category in IMPACT World+ is built on the same fate model used for the climate change impact category and incorporates species sensitivity distributions (SSDs) developed by Azevedo et al. (2015), focusing on the response of calcifying species to decreasing seawater pH.

More recently, Scherer et al. (2022) proposed alternative and improved CFs for ocean acidification impacts on marine biodiversity (cnidarians, crustaceans, echinoderms, fish, and molluscs, further distinguishing between slightly and strongly calcifying). Their work integrates the fate-exposure model of Bach et al. (2016), which studies how greenhouse gas releases impact seawater pH, and expands the SSDs by including additional taxa from diverse climate regions. Building on these developments, Anderson et al. (2025) further improve species coverage (arthropods, chordates, cnidarians, echinoderms, molluscs, and poriferans) and spatial delineation to propose complete and regionalised midpoint and endpoint CFs that account for the geographic variability of ocean acidification impacts.

# References

Anderson SR, Stadler K, Verones F (2025) From global emissions to local impacts: Spatially explicit modeling of ocean acidification in life cycle assessment. Environ Sci Technol 59:22508−22517. https://doi.org/10.1021/acs.est.5c02069

Anschütz A-A, Lencina-Avila JM, Rehder G, et al (2025) Direct effects of ocean alkalinity enhancement in the Baltic Sea–results from in-silico experiments. Front Clim 7:1450468. https://doi.org/10.3389/fclim.2025.1450468

Azevedo LB, De Schryver AM, Hendriks AJ, Huijbregts MAJ (2015) Calcifying species sensitivity distributions for ocean acidification. Environ Sci Technol 49:1495–1500. https://doi.org/10.1021/es505485m

Bach LT, Gill SJ, Rickaby REM, et al (2019) CO2 removal with enhanced weathering and ocean alkalinity enhancement: Potential risks and co-benefits for marine pelagic ecosystems. Front Clim 1:7. https://doi.org/10.3389/fclim.2019.00007

Bach V, Möller F, Finogenova N, et al (2016) Characterization model to assess ocean acidification within life cycle assessment. Int J Life Cycle Assess 21:1463–1472. https://doi.org/10.1007/s11367-016-1121-x

Bulle C, Margni M, Patouillard L, et al (2019) IMPACT World+: A globally regionalized life cycle impact assessment method. Int J Life Cycle Assess 24:1653–1674. https://doi.org/10.1007/s11367-019-01583-0

Carvalho BC, De Souza Junior HRA, Soares SR (2024) Evaluation of LCIA characterization models for marine ecotoxicity. Int J Life Cycle Assess 29:706–732. https://doi.org/10.1007/s11367-023-02277-4

Cosme N, Hauschild MZ (2017) Characterization of waterborne nitrogen emissions for marine eutrophication modelling in life cycle impact assessment at the damage level and global scale. Int J Life Cycle Assess 22:1558–1570. https://doi.org/10.1007/s11367-017-1271-5

Cosme N, Koski M, Hauschild MZ (2015) Exposure factors for marine eutrophication impacts assessment based on a mechanistic biological model. Ecological Modelling 317:50–63. https://doi.org/10.1016/j.ecolmodel.2015.09.005

Cosme N, Mayorga E, Hauschild MZ (2018) Spatially explicit fate factors of waterborne nitrogen emissions at the global scale. Int J Life Cycle Assess 23:1286–1296. https://doi.org/10.1007/s11367-017-1349-0

Dale AW, Geilert S, Diercks I, et al (2024) Seafloor alkalinity enhancement as a carbon dioxide removal strategy in the Baltic Sea. Commun Earth Environ 5:452. https://doi.org/10.1038/s43247-024-01569-3

De Pryck K, Boettcher M (2024) The rise, fall and rebirth of ocean carbon sequestration as a climate “solution.” Glob Environ Change 85:102820. https://doi.org/10.1016/j.gloenvcha.2024.102820

Dong Y, Rosenbaum RK, Hauschild MZ (2016) Assessment of metal toxicity in marine ecosystems: Comparative toxicity potentials for nine cationic metals in coastal seawater. Environ Sci Technol 50:269–278. https://doi.org/10.1021/acs.est.5b01625

Dong Y, Rosenbaum RK, Hauschild MZ (2018) Metal toxicity characterization factors for marine ecosystems—considering the importance of the estuary for freshwater emissions. Int J Life Cycle Assess 23:1641–1653. https://doi.org/10.1007/s11367-017-1376-x

EC-JRC (2010) International Reference Life Cycle Data System (ILCD) Handbook. General Guide for Life Cycle Assessment: Detailed Guidance. European Commission, Joint Research Centre, Institute for Environment and Sustainability, Luxembourg

EC-JRC (2012) Characterisation factors of the ILCD recommended life cycle impact assessment methods. Database and supporting information. European Commission, Joint Research Centre, Institute for Environment and Sustainability, Luxembourg

Fantke P, Aurisano N, Bare J, et al (2018) Toward harmonizing ecotoxicity characterization in life cycle impact assessment. Environ Toxicol Chem 37:2955–2971. https://doi.org/10.1002/etc.4261

Fuhr M, Dale AW, Wallmann K, et al (2025) Calcite is an efficient and low-cost material to enhance benthic weathering in shelf sediments of the Baltic Sea. Commun Earth Environ 6:106. https://doi.org/10.1038/s43247-025-02079-6

Geerts LJJ, Hylén A, Meysman FJR (2025) Review and syntheses: Ocean alkalinity enhancement and carbon dioxide removal through marine enhanced rock weathering using olivine. Biogeosciences 22:355–384. https://doi.org/10.5194/bg-22-355-2025

Gentile E, Tarantola F, Lockley A, et al (2022) Use of aircraft in ocean alkalinity enhancement. Sci Total Environ 822:153484. https://doi.org/10.1016/j.scitotenv.2022.153484

Guinée J (2002) Handbook on Life Cycle Assessment: Operational guide to the ISO standards. Springer Science & Business Media

Haigh R, Ianson D, Holt CA, et al (2015) Effects of ocean acidification on temperate coastal marine ecosystems and fisheries in the Northeast Pacific. PLoS ONE 10:e0117533. https://doi.org/10.1371/journal.pone.0117533

Hartmann J, Suitner N, Lim C, et al (2023) Stability of alkalinity in ocean alkalinity enhancement (OAE) approaches – consequences for durability of CO2 storage. Biogeosciences 20:781–802. https://doi.org/10.5194/bg-20-781-2023

Hauschild MZ, Goedkoop M, Guinée J, et al (2013) Identifying best existing practice for characterization modeling in life cycle impact assessment. Int J Life Cycle Assess 18:683–697. https://doi.org/10.1007/s11367-012-0489-5

He J, Tyka MD (2023) Limits and CO2 equilibration of near-coast alkalinity enhancement. Biogeosciences 20:27–43. https://doi.org/10.5194/bg-20-27-2023

Heijungs R, de Koning A (2004) Improvement of LCA characterization factors and LCA practice for metals. TNO Environment, Energy and Process Innovation, Netherlands

Henderson AD, Niblick B, Golden HE, Bare JC (2021) Modeling spatially resolved characterization factors for eutrophication potential in life cycle assessment. Int J Life Cycle Assess 26:1832–1846. https://doi.org/10.1007/s11367-021-01956-4

Henryson K, Hansson P-A, Sundberg C (2018) Spatially differentiated midpoint indicator for marine eutrophication of waterborne emissions in Sweden. Int J Life Cycle Assess 23:70–81. https://doi.org/10.1007/s11367-017-1298-7

Henryson K, Kätterer T, Tidåker P, Sundberg C (2020) Soil N2O emissions, N leaching and marine eutrophication in life cycle assessment – A comparison of modelling approaches. Sci Total Environ 725:138332. https://doi.org/10.1016/j.scitotenv.2020.138332

Huijbregts MAJ (2016) ReCiPe 2016 - A harmonized life cycle impact assessment method at midpoint and endpoint level - Report I: Characterization. RIVM, Netherlands

Huijbregts MAJ, Steinmann ZJN, Elshout PMF, et al (2017) ReCiPe 2016 v1.1: A harmonized life cycle impact assessment method at midpoint and endpoint level Report I: Characterization. RIVM, Netherlands

Huijbregts MAJ, Thissen U, Guinee JB, et al (2000) Priority assessment of toxic substances in life cycle assessment. Part I: Calculation of toxicity potentials for 181 substances with the nested multi-media fate, exposure and effects model USES±LCA. Chemosphere 41:541–573

Isometric (2025) 625.64 credits issued to Planetary. https://registry.isometric.com/issuance/iss_1JXW6N77B1S05B02. Accessed 7 July 2025

Kounina A, Margni M, Shaked S, et al (2014) Spatial analysis of toxic emissions in LCA: A sub-continental nested USEtox model with freshwater archetypes. Environ Int 69:67–89. https://doi.org/10.1016/j.envint.2014.04.004

Le Quesne WJF, Pinnegar JK (2012) The potential impacts of ocean acidification: scaling from physiology to fisheries. Fish Fish 13:333–344. https://doi.org/10.1111/j.1467-2979.2011.00423.x

Meysman FJR, Montserrat F (2017) Negative CO2 emissions via enhanced silicate weathering in coastal environments. Biol Lett 13:20160905. https://doi.org/10.1098/rsbl.2016.0905

Moras CA, Cyronak T, Bach LT, et al (2024) Effects of grain size and seawater salinity on magnesium hydroxide dissolution and secondary calcium carbonate precipitation kinetics: implications for ocean alkalinity enhancement. Biogeosciences 21:3463–3475. https://doi.org/10.5194/bg-21-3463-2024

Morelli B, Hawkins TR, Niblick B, et al (2018) Critical review of eutrophication models for life cycle assessment. Environ Sci Technol 52:9562–9578. https://doi.org/10.1021/acs.est.8b00967

NASEM (2022) A Research Strategy for Ocean-based Carbon Dioxide Removal and Sequestration, National Academies of Sciences, Engineering, and Medicine. National Academies Press, Washington D.C.

Nawaz S, Lezaun J, Valenzuela JM, Renforth P (2023) Broaden research on ocean alkalinity enhancement to better characterize social impacts. Environ Sci Technol 57:8863–8869. https://doi.org/10.1021/acs.est.2c09595

Ocean Visions (2025) Ocean Visions mCDR Field Trial Database. https://oceanvisions.org/mcdr-field-trials/. Accessed 30 Apr 2025

Oschlies A, Bach LT, Fennel K, et al (2025) Perspectives and challenges of marine carbon dioxide removal. Front Clim 6:1506181. https://doi.org/10.3389/fclim.2024.1506181

Renforth P, Henderson G (2017) Assessing ocean alkalinity for carbon sequestration. Rev Geophys 55:636–674. https://doi.org/10.1002/2016RG000533

Ringham MC, Hirtle N, Shaw C, et al (2024) An assessment of ocean alkalinity enhancement using aqueous hydroxides: kinetics, efficiency, and precipitation thresholds. Biogeosciences 21:3551–3570. https://doi.org/10.5194/bg-21-3551-2024

Roy P-O, Huijbregts M, Deschênes L, Margni M (2012) Spatially-differentiated atmospheric source–receptor relationships for nitrogen oxides, sulfur oxides and ammonia emissions at the global scale for life cycle impact assessment. Atmos Environ 62:74–81. https://doi.org/10.1016/j.atmosenv.2012.07.069

Scherer L, Gürdal İ, Van Bodegom PM (2022) Characterization factors for ocean acidification impacts on marine biodiversity. J Ind Ecol 26:2069–2079. https://doi.org/10.1111/jiec.13274

Serafini S, Ciroth A (2024) TRACI 2.2 method documentation. GreenDelta GmbH, Berlin

Sloterdijk H, Grünhagen C, Voss R, et al (2025) Future scenarios of global fisheries and ocean alkalinity enhancement under socio‐economic and climate pathways. Earth’s futur 13:e2024EF005478. https://doi.org/10.1029/2024EF005478

Smith S, Geden O, Gidden M, et al (2024) The State of Carbon Dioxide Removal - 2nd Edition

Struijs J, Beusen A, van Jaarsveld H, Huijbregts M (2009) Chapter 6: Aquatic eutrophication. In: ReCiPe 2008 - A life cycle impact assessment method which comprises harmonised category indicators at the midpoint and the endpoint level, First edition. Netherlands, pp 59–67

Van Zelm R, Huijbregts MAJ, Van De Meent D (2009) USES-LCA 2.0—A global nested multi-media fate, exposure, and effects model. Int J Life Cycle Assess 14:282–284. https://doi.org/10.1007/s11367-009-0066-8

Vea EB, Jwaideh M, Richardson K, et al (2024) Enabling comprehensive assessment of marine eutrophication impacts and their evaluation against regional safe operating space. Int J Life Cycle Assess 29:1738–1755. https://doi.org/10.1007/s11367-024-02311-z

Verones F, Hellweg S, Antón A, et al (2020) LC‐IMPACT: A regionalized life cycle damage assessment method. J of Industrial Ecology 24:1201–1219. https://doi.org/10.1111/jiec.13018
